# Supplementary material for: The mechanism of H171T resistance reveals the importance of Nδ-protonated His171 for the binding of allosteric inhibitor BI-D to HIV-1 integrase
Source: PubMed Central journal article supplement (PMC4251946; doi:10.1186/s12977-014-0100-1), 2014-11-25
Supplement: 12977_2014_100_MOESM1_ESM.pdf [file 12977_2014_100_MOESM1_ESM.pdf]

## Supplemental Information.

### Structural analysis of the free energy simulations of BI-D binding to HIV-1 IN CCD

We have analyzed the MD simulated structures obtained at the fully coupled ensemble ( $\lambda = 1$ ) in the binding free energy simulations. It is observed that the bound ligand in the simulated structures maintains the binding mode seen in the crystal structure. The largest RMS deviation from the crystal structure is only 0.62 Å for the ligand heavy atoms (see Supplemental Table 1). The MD simulated structures obtained using different His171 protonation states show important differences in the orientations of the His171 side chain (see Supplemental Figure 1). In both the doubly-protonated His171 and N<sub>δ</sub>-protonated His171, the imidazole ring of His171 maintains the orientation seen in the crystal structure which enables it to form the hydrogen bond with the ether oxygen seen in the *tert*-butoxy group of BI-D. In the N<sub>ε</sub>-protonated His171 however, the imidazole ring is flipped ~180 degree from the orientation in the crystal structure, and the N<sub>ε</sub>-H bond is pointing towards the solvent. No hydrogen bond is formed between the imidazole ring and the ether oxygen. This observation is consistent with the binding free energy calculation reported in Table 2 of the main text, which shows weak ligand-protein interaction in the case of N<sub>ε</sub>-protonated His171 receptor.

**Supplemental Table 1.** Heavy RMS deviation between the simulated bound ligand and the crystal structures. Unit: Å.

| Receptor                          | RMSD |
|-----------------------------------|------|
| His171-doubly-protonated          | 0.53 |
| His171-N <sub>δ</sub> -protonated | 0.57 |
| His171-N <sub>ε</sub> -protonated | 0.50 |
| The H171T mutant                  | 0.62 |

**Supplemental Table 2. Data collection and structure refinement statistics.**

| <b>Data collection</b>                     |                                                                     |
|--------------------------------------------|---------------------------------------------------------------------|
| Wavelength (Å)                             | 1.541                                                               |
|                                            |                                                                     |
| Unique reflection                          | 15111                                                               |
| Space group                                | P3121                                                               |
| Unit-cell parameters (Å °)                 | a=72.248, b=72.248, c=66.032<br>$\alpha = \beta = 90, \gamma = 120$ |
| Molecules per ASU                          | 1                                                                   |
| Resolution range (Å)                       | 1.94                                                                |
| Completeness (%)                           | 99.9 (100)                                                          |
| Redundancy                                 | 4.9 ( 4.8)                                                          |
| I / $\sigma$                               | 48.4 (4.22)                                                         |
| R <sub>merge</sub> (%)                     | 5.4(44.5)                                                           |
| <b>Structure refinement</b>                |                                                                     |
| Resolution (Å)                             | 1.94                                                                |
| R <sub>cryst</sub> / R <sub>free</sub> (%) | 0.190/0.221                                                         |
| R.m.s.d from ideal values                  |                                                                     |
| Bond length (Å)                            | 0.0165                                                              |
| Bond angle (°)                             | 1.9265                                                              |
| Average B factor                           | 46                                                                  |
| PDB #                                      | 4TSX                                                                |

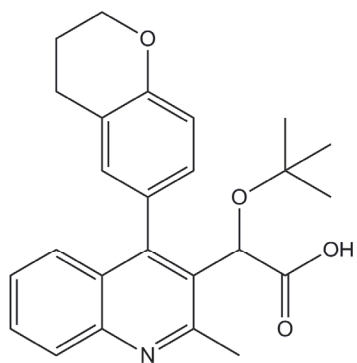

**BI-D**

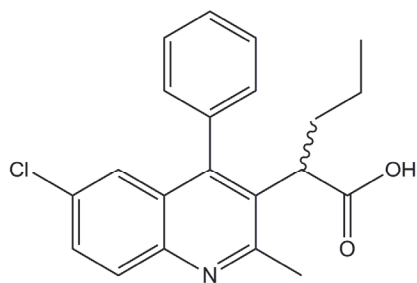

**LEDGIN-6**

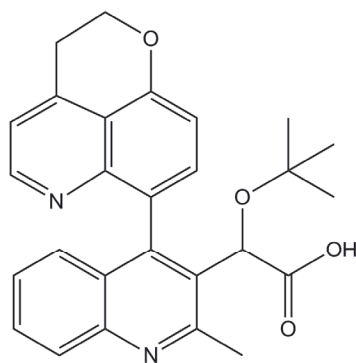

**BI-224436**

Supplemental Figure 1. Chemical structures of BI-D, LEDGIN-6 and BI-224436.

### N $\delta$ -protonated His171

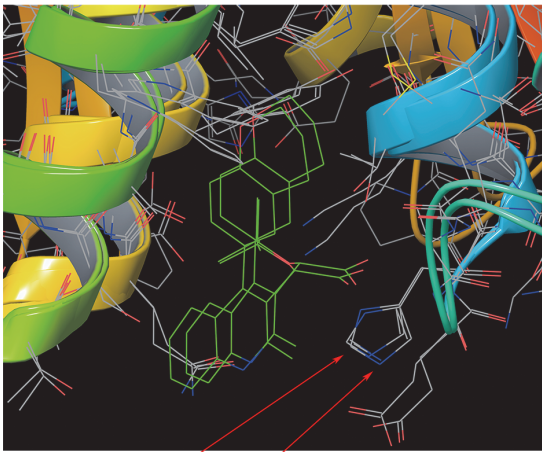

X-ray MD

### Doubly charged His171

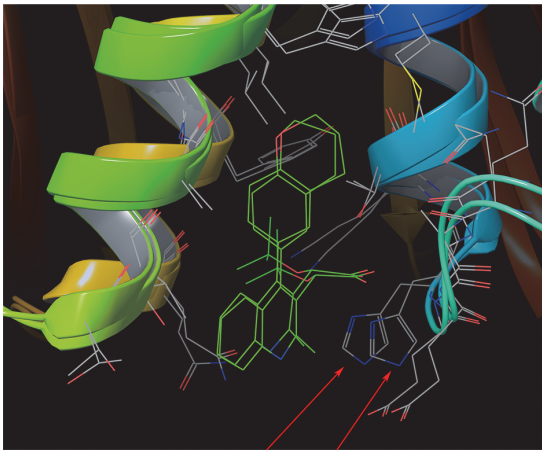

MD X-ray

### N $\epsilon$ -protonated His171

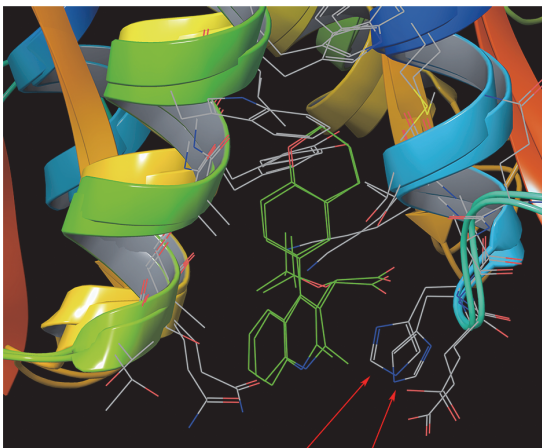

X-ray MD

Supplemental Figure 2. The MD simulated structures obtained using different His171 protonation states. The simulated structure at 15 ns is superimposed onto the X-ray crystal structure. The His171 side chain is indicated by the red arrows for the MD simulation (MD) and the crystal structure (X-ray).

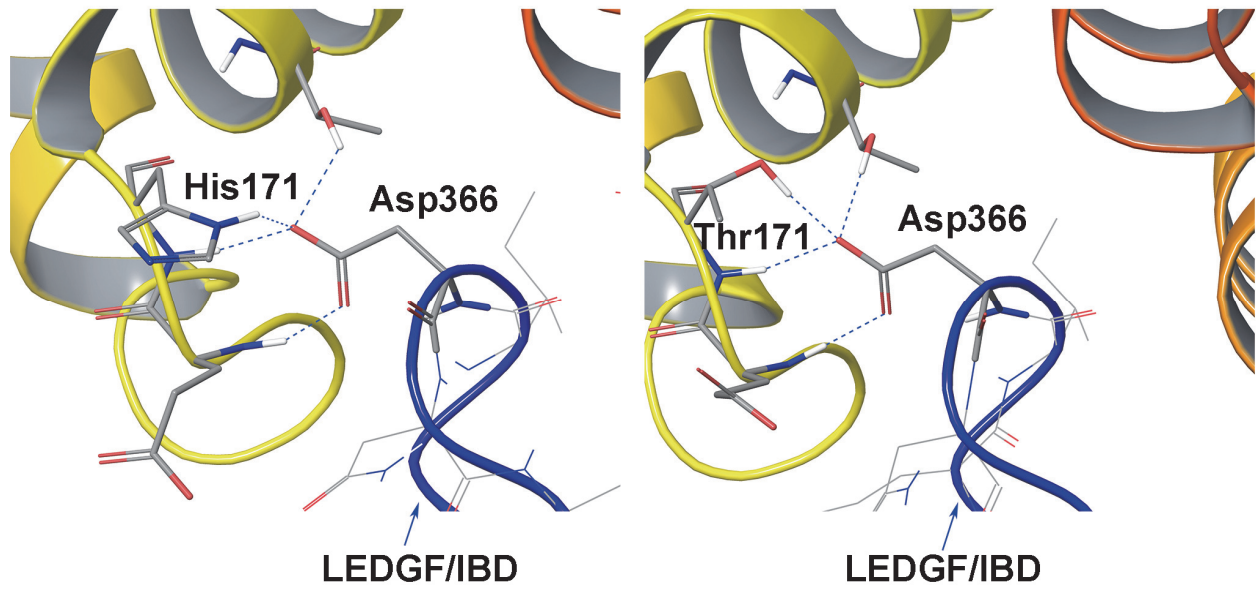

Supplemental Figure 3. The MD simulations reveal similar hydrogen bonding between LEDGF/p75 Asp366 with the WT (left) and the H171T mutant (right) IN CCDs.
